# Supplementary material
Source: Springer Nature journal article supplement (https://www.springermedizin.de/resource/supplementary/12889_2013_6360_MOESM5_ESM.docx/9497720)
Supplement: MOESM5 [file 9497720]

## Table 4. Socio-demographic data (n=36*).

|  |  |  |
| --- | --- | --- |
|  |  |  |
|  |  |  |
|  |  |  |
| Variables | n | % |
| Age (years) |  |  |
| <37 | 22 | 61.1 |
| ≥37 | 14 | 38.9 |
| Marital status |  |  |
| Married or Living together | 4 | 11.1 |
| Divorced or Separated | 5 | 13.9 |
| Widowed | 27 | 75.0 |
| Never Married | 0 | 0 |
| Education |  |  |
| None | 7 | 19.4 |
| Primary | 19 | 52.8 |
| Secondary or Higher | 10 | 27.8 |
| Health status |  |  |
| Good | 18 | 50.0 |
| Some concerns | 15 | 41.7 |
| Feel bad | 3 | 8.3 |
| Time since diagnosis of HIV positivity (median: 48 months) |  |  |
| <48 | 23 | 63.9 |
| ≥48 | 12 | 33.3 |
| Unsure | 1 | 2.8 |

* 36 women who were excluded due to invalid answers regarding the last sexual intercourse and contraception use at last sexual intercourse.
